# Supplementary material for: Concerted functions of Streptococcus gordonii surface proteins PadA and Hsa mediate activation of human platelets and interactions with extracellular matrix
Source: PubMed Central journal article supplement (PMC5574023; doi:10.1111/cmi.12667), 2016-10-11
Supplement: CMI-19-na-s001.pdf [file CMI-19-na-s001.pdf]

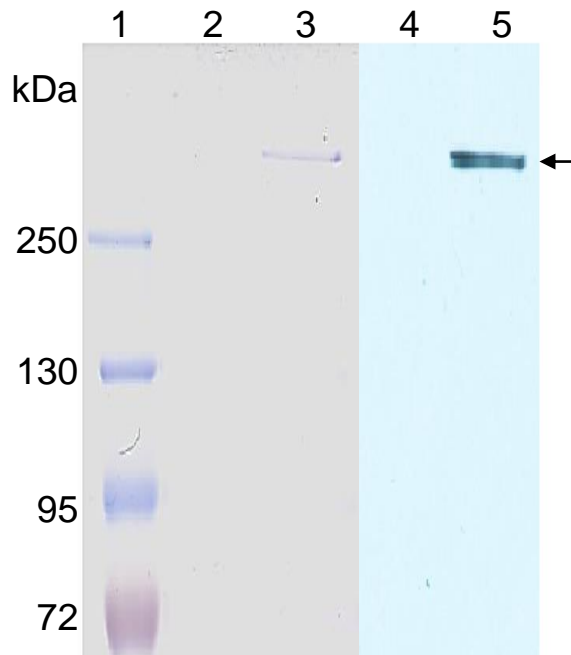

**Figure S1.** Expression of full-length PadA from *S. gordonii*. Cultures of *S. gordonii* UB2870  $\Delta padA/pMSP-padA_{6His}$  were grown in TY-Glc medium containing nisin ( $100 \text{ ng ml}^{-1}$ ) at  $37^\circ\text{C}$  to early stationary phase. Cultures were centrifuged ( $12000 \times g$ , 10 min,  $4^\circ\text{C}$ ), the supernatants carefully removed, filtered and concentrated to 4 ml with a centrifugal filter unit. Samples were subjected to SDS-PAGE and gels were stained with Coomassie Blue (lanes 1-3) or electroblotted onto nitrocellulose and incubated with anti-PadAF2 antibodies (lanes 4 and 5). Antibody binding was detected with HRP-conjugated goat anti-rabbit antibodies followed by ECL (Amersham) on X-ray film. Lanes: 1, Molecular mass markers; 2, DL1; 3, UB2870; 4, DL1; 5, UB2870. PadA<sub>6His</sub> is indicated by the arrow.
